# Supplementary material for: Nanoscale Diblock Copolymer Micelles: Characterizations and Estimation of the Effective Diffusion Coefficients of Biomolecules Release through Cylindrical Diffusion Model
Source: PubMed Central journal article supplement (PMC4136833; doi:10.1371/journal.pone.0105234), 2014-08-18
Supplement: pone.0105234.s001.pdf [file pone.0105234.s001.pdf]

```

NEW FILE.
DATASET NAME DataSet2 WINDOW=FRONT.
T-TEST GROUPS=Formulation(1 2)
  /MISSING=ANALYSIS
  /VARIABLES=Release
  /CRITERIA=CI(.95).

```

## T-Test 0h

### Notes

|                        |                                                                                                 |                                                                                                                            |
|------------------------|-------------------------------------------------------------------------------------------------|----------------------------------------------------------------------------------------------------------------------------|
| Output Created         | 12-JUL-2014 21:30:45                                                                            |                                                                                                                            |
| Comments               |                                                                                                 |                                                                                                                            |
| Input                  | Active Dataset                                                                                  | DataSet2                                                                                                                   |
|                        | Filter                                                                                          | <none>                                                                                                                     |
|                        | Weight                                                                                          | <none>                                                                                                                     |
|                        | Split File                                                                                      | <none>                                                                                                                     |
|                        | N of Rows in Working Data File                                                                  | 6                                                                                                                          |
| Missing Value Handling | Definition of Missing                                                                           | User defined missing values are treated as missing.                                                                        |
|                        | Cases Used                                                                                      | Statistics for each analysis are based on the cases with no missing or out-of-range data for any variable in the analysis. |
| Syntax                 | T-TEST GROUPS=Formulation(1 2)<br>/MISSING=ANALYSIS<br>/VARIABLES=Release<br>/CRITERIA=CI(.95). |                                                                                                                            |
| Resources              | Processor Time                                                                                  | 00:00:00.00                                                                                                                |
|                        | Elapsed Time                                                                                    | 00:00:00.00                                                                                                                |

[DataSet2] 0 time

### Group Statistics

|         | Formulation | N | Mean   | Std. Deviation | Std. Error Mean |
|---------|-------------|---|--------|----------------|-----------------|
| Release | BSA ph5     | 3 | 1.5000 | .62450         | .36056          |
|         | BSA ph7.4   | 3 | 1.0667 | .60277         | .34801          |

**Independent Samples Test**

|         |                             | Levene's Test for Equality of Variances |      | t-test for Equality of Means |       |
|---------|-----------------------------|-----------------------------------------|------|------------------------------|-------|
|         |                             | F                                       | Sig. | t                            | df    |
| Release | Equal variances assumed     | .037                                    | .856 | .865                         | 4     |
|         | Equal variances not assumed |                                         |      | .865                         | 3.995 |

**Independent Samples Test**

|         |                             | t-test for Equality of Means |                 |                       |                    |
|---------|-----------------------------|------------------------------|-----------------|-----------------------|--------------------|
|         |                             | Sig. (2-tailed)              | Mean Difference | Std. Error Difference | 95% Confidence ... |
|         |                             |                              |                 |                       | Lower              |
| Release | Equal variances assumed     | .436                         | .43333          | .50111                | -.95797            |
|         | Equal variances not assumed | .436                         | .43333          | .50111                | -.95866            |

**Independent Samples Test**

|         |                             | t-test for Equality of Means       |
|---------|-----------------------------|------------------------------------|
|         |                             | 95% Confidence Interval of the ... |
|         |                             | Upper                              |
| Release | Equal variances assumed     | 1.82464                            |
|         | Equal variances not assumed | 1.82533                            |

```
T-TEST GROUPS=Formulation(1 2)
/MISSING=ANALYSIS
/VARIABLES=Release
/CRITERIA=CI(.95).
```

**T-Test 1h**

**Notes**

|                        |                                                                                                 |                                                                                                                            |
|------------------------|-------------------------------------------------------------------------------------------------|----------------------------------------------------------------------------------------------------------------------------|
| Output Created         | 12-JUL-2014 21:32:52                                                                            |                                                                                                                            |
| Comments               |                                                                                                 |                                                                                                                            |
| Input                  | Active Dataset                                                                                  | DataSet2                                                                                                                   |
|                        | Filter                                                                                          | <none>                                                                                                                     |
|                        | Weight                                                                                          | <none>                                                                                                                     |
|                        | Split File                                                                                      | <none>                                                                                                                     |
|                        | N of Rows in Working Data File                                                                  | 6                                                                                                                          |
| Missing Value Handling | Definition of Missing                                                                           | User defined missing values are treated as missing.                                                                        |
|                        | Cases Used                                                                                      | Statistics for each analysis are based on the cases with no missing or out-of-range data for any variable in the analysis. |
| Syntax                 | T-TEST GROUPS=Formulation(1 2)<br>/MISSING=ANALYSIS<br>/VARIABLES=Release<br>/CRITERIA=CI(.95). |                                                                                                                            |
| Resources              | Processor Time                                                                                  | 00:00:00.00                                                                                                                |
|                        | Elapsed Time                                                                                    | 00:00:00.00                                                                                                                |

**Group Statistics**

|         | Formulation | N | Mean    | Std. Deviation | Std. Error Mean |
|---------|-------------|---|---------|----------------|-----------------|
| Release | BSA ph5     | 3 | 18.0667 | 3.29292        | 1.90117         |
|         | BSA ph7.4   | 3 | 10.0000 | 2.00000        | 1.15470         |

**Independent Samples Test**

|         |                             | Levene's Test for Equality of Variances |      | t-test for Equality of Means |       |
|---------|-----------------------------|-----------------------------------------|------|------------------------------|-------|
|         |                             | F                                       | Sig. | t                            | df    |
| Release | Equal variances assumed     | 1.531                                   | .284 | 3.627                        | 4     |
|         | Equal variances not assumed |                                         |      | 3.627                        | 3.299 |

**Independent Samples Test**

|         |                             | t-test for Equality of Means |                 |                       |                    |
|---------|-----------------------------|------------------------------|-----------------|-----------------------|--------------------|
|         |                             | Sig. (2-tailed)              | Mean Difference | Std. Error Difference | 95% Confidence ... |
|         |                             |                              |                 |                       | Lower              |
| Release | Equal variances assumed     | .022                         | 8.06667         | 2.22436               | 1.89085            |
|         | Equal variances not assumed | .031                         | 8.06667         | 2.22436               | 1.33705            |

**Independent Samples Test**

|         |                             | t-test for Equality of Means       |
|---------|-----------------------------|------------------------------------|
|         |                             | 95% Confidence Interval of the ... |
|         |                             | Upper                              |
| Release | Equal variances assumed     | 14.24248                           |
|         | Equal variances not assumed | 14.79629                           |

```
T-TEST GROUPS=Formulation(1 2)
/MISSING=ANALYSIS
/VARIABLES=Release
/CRITERIA=CI(.95).
```

**T-Test 3h**

**Notes**

|                        |                                                                                                 |                                                                                                                            |
|------------------------|-------------------------------------------------------------------------------------------------|----------------------------------------------------------------------------------------------------------------------------|
| Output Created         | 12-JUL-2014 21:34:24                                                                            |                                                                                                                            |
| Comments               |                                                                                                 |                                                                                                                            |
| Input                  | Active Dataset                                                                                  | DataSet2                                                                                                                   |
|                        | Filter                                                                                          | <none>                                                                                                                     |
|                        | Weight                                                                                          | <none>                                                                                                                     |
|                        | Split File                                                                                      | <none>                                                                                                                     |
|                        | N of Rows in Working Data File                                                                  | 6                                                                                                                          |
| Missing Value Handling | Definition of Missing                                                                           | User defined missing values are treated as missing.                                                                        |
|                        | Cases Used                                                                                      | Statistics for each analysis are based on the cases with no missing or out-of-range data for any variable in the analysis. |
| Syntax                 | T-TEST GROUPS=Formulation(1 2)<br>/MISSING=ANALYSIS<br>/VARIABLES=Release<br>/CRITERIA=CI(.95). |                                                                                                                            |
| Resources              | Processor Time                                                                                  | 00:00:00.00                                                                                                                |
|                        | Elapsed Time                                                                                    | 00:00:00.00                                                                                                                |

**Group Statistics**

|         | Formulation | N | Mean    | Std. Deviation | Std. Error Mean |
|---------|-------------|---|---------|----------------|-----------------|
| Release | BSA ph5     | 3 | 26.0000 | 2.00000        | 1.15470         |
|         | BSA ph7.4   | 3 | 20.0333 | 3.72872        | 2.15278         |

**Independent Samples Test**

|         |                             | Levene's Test for Equality of Variances |      | t-test for Equality of Means |       |
|---------|-----------------------------|-----------------------------------------|------|------------------------------|-------|
|         |                             | F                                       | Sig. | t                            | df    |
| Release | Equal variances assumed     | 1.086                                   | .356 | 2.442                        | 4     |
|         | Equal variances not assumed |                                         |      | 2.442                        | 3.063 |

**Independent Samples Test**

|         |                             | t-test for Equality of Means |                 |                       |                    |
|---------|-----------------------------|------------------------------|-----------------|-----------------------|--------------------|
|         |                             | Sig. (2-tailed)              | Mean Difference | Std. Error Difference | 95% Confidence ... |
|         |                             |                              |                 |                       | Lower              |
| Release | Equal variances assumed     | .071                         | 5.96667         | 2.44290               | -.81592            |
|         | Equal variances not assumed | .091                         | 5.96667         | 2.44290               | -1.71829           |

**Independent Samples Test**

|         |                             | t-test for Equality of Means       |
|---------|-----------------------------|------------------------------------|
|         |                             | 95% Confidence Interval of the ... |
|         |                             | Upper                              |
| Release | Equal variances assumed     | 12.74925                           |
|         | Equal variances not assumed | 13.65163                           |

```
T-TEST GROUPS=Formulation(1 2)
/MISSING=ANALYSIS
/VARIABLES=Release
/CRITERIA=CI(.95).
```

**T-Test 4h**

**Notes**

|                        |                                                                                                 |                                                                                                                            |
|------------------------|-------------------------------------------------------------------------------------------------|----------------------------------------------------------------------------------------------------------------------------|
| Output Created         | 12-JUL-2014 21:36:30                                                                            |                                                                                                                            |
| Comments               |                                                                                                 |                                                                                                                            |
| Input                  | Active Dataset                                                                                  | DataSet2                                                                                                                   |
|                        | Filter                                                                                          | <none>                                                                                                                     |
|                        | Weight                                                                                          | <none>                                                                                                                     |
|                        | Split File                                                                                      | <none>                                                                                                                     |
|                        | N of Rows in Working Data File                                                                  | 6                                                                                                                          |
| Missing Value Handling | Definition of Missing                                                                           | User defined missing values are treated as missing.                                                                        |
|                        | Cases Used                                                                                      | Statistics for each analysis are based on the cases with no missing or out-of-range data for any variable in the analysis. |
| Syntax                 | T-TEST GROUPS=Formulation(1 2)<br>/MISSING=ANALYSIS<br>/VARIABLES=Release<br>/CRITERIA=CI(.95). |                                                                                                                            |
| Resources              | Processor Time                                                                                  | 00:00:00.00                                                                                                                |
|                        | Elapsed Time                                                                                    | 00:00:00.01                                                                                                                |

**Group Statistics**

|         | Formulation | N | Mean    | Std. Deviation | Std. Error Mean |
|---------|-------------|---|---------|----------------|-----------------|
| Release | BSA ph5     | 3 | 31.0000 | 1.00000        | .57735          |
|         | BSA ph7.4   | 3 | 26.0000 | 4.58258        | 2.64575         |

**Independent Samples Test**

|         |                             | Levene's Test for Equality of Variances |      | t-test for Equality of Means |       |
|---------|-----------------------------|-----------------------------------------|------|------------------------------|-------|
|         |                             | F                                       | Sig. | t                            | df    |
| Release | Equal variances assumed     | 4.571                                   | .099 | 1.846                        | 4     |
|         | Equal variances not assumed |                                         |      | 1.846                        | 2.190 |

### Independent Samples Test

|         |                             | t-test for Equality of Means |                 |                       |                    |
|---------|-----------------------------|------------------------------|-----------------|-----------------------|--------------------|
|         |                             | Sig. (2-tailed)              | Mean Difference | Std. Error Difference | 95% Confidence ... |
|         |                             |                              |                 |                       | Lower              |
| Release | Equal variances assumed     | .139                         | 5.00000         | 2.70801               | -2.51865           |
|         | Equal variances not assumed | .195                         | 5.00000         | 2.70801               | -5.73439           |

### Independent Samples Test

|         |                             | t-test for Equality of Means       |
|---------|-----------------------------|------------------------------------|
|         |                             | 95% Confidence Interval of the ... |
|         |                             | Upper                              |
| Release | Equal variances assumed     | 12.51865                           |
|         | Equal variances not assumed | 15.73439                           |

```
T-TEST GROUPS=Formulation(1 2)
/MISSING=ANALYSIS
/VARIABLES=Release
/CRITERIA=CI(.95).
```

## T-Test 24h



**Notes**

|                        |                                                                                                 |                                                                                                                            |
|------------------------|-------------------------------------------------------------------------------------------------|----------------------------------------------------------------------------------------------------------------------------|
| Output Created         | 12-JUL-2014 21:37:52                                                                            |                                                                                                                            |
| Comments               |                                                                                                 |                                                                                                                            |
| Input                  | Active Dataset                                                                                  | DataSet2                                                                                                                   |
|                        | Filter                                                                                          | <none>                                                                                                                     |
|                        | Weight                                                                                          | <none>                                                                                                                     |
|                        | Split File                                                                                      | <none>                                                                                                                     |
|                        | N of Rows in Working Data File                                                                  | 6                                                                                                                          |
| Missing Value Handling | Definition of Missing                                                                           | User defined missing values are treated as missing.                                                                        |
|                        | Cases Used                                                                                      | Statistics for each analysis are based on the cases with no missing or out-of-range data for any variable in the analysis. |
| Syntax                 | T-TEST GROUPS=Formulation(1 2)<br>/MISSING=ANALYSIS<br>/VARIABLES=Release<br>/CRITERIA=CI(.95). |                                                                                                                            |
| Resources              | Processor Time                                                                                  | 00:00:00.02                                                                                                                |
|                        | Elapsed Time                                                                                    | 00:00:00.01                                                                                                                |

**Group Statistics**

|         | Formulation | N | Mean    | Std. Deviation | Std. Error Mean |
|---------|-------------|---|---------|----------------|-----------------|
| Release | BSA ph5     | 3 | 40.0000 | 3.00000        | 1.73205         |
|         | BSA ph7.4   | 3 | 32.0000 | 3.60555        | 2.08167         |

**Independent Samples Test**

|         |                             | Levene's Test for Equality of Variances |      | t-test for Equality of Means |       |
|---------|-----------------------------|-----------------------------------------|------|------------------------------|-------|
|         |                             | F                                       | Sig. | t                            | df    |
| Release | Equal variances assumed     | .250                                    | .643 | 2.954                        | 4     |
|         | Equal variances not assumed |                                         |      | 2.954                        | 3.872 |

**Independent Samples Test**

|         |                             | t-test for Equality of Means |                 |                       |                    |
|---------|-----------------------------|------------------------------|-----------------|-----------------------|--------------------|
|         |                             | Sig. (2-tailed)              | Mean Difference | Std. Error Difference | 95% Confidence ... |
|         |                             |                              |                 |                       | Lower              |
| Release | Equal variances assumed     | .042                         | 8.00000         | 2.70801               | .48135             |
|         | Equal variances not assumed | .044                         | 8.00000         | 2.70801               | .38231             |

**Independent Samples Test**

|         |                             | t-test for Equality of Means       |
|---------|-----------------------------|------------------------------------|
|         |                             | 95% Confidence Interval of the ... |
|         |                             | Upper                              |
| Release | Equal variances assumed     | 15.51865                           |
|         | Equal variances not assumed | 15.61769                           |

```
T-TEST GROUPS=Formulation(1 2)
/MISSING=ANALYSIS
/VARIABLES=Release
/CRITERIA=CI(.95).
```

**T-Test 48h**

**Notes**

|                        |                                                                                                 |                                                                                                                            |
|------------------------|-------------------------------------------------------------------------------------------------|----------------------------------------------------------------------------------------------------------------------------|
| Output Created         | 12-JUL-2014 21:38:57                                                                            |                                                                                                                            |
| Comments               |                                                                                                 |                                                                                                                            |
| Input                  | Active Dataset                                                                                  | DataSet2                                                                                                                   |
|                        | Filter                                                                                          | <none>                                                                                                                     |
|                        | Weight                                                                                          | <none>                                                                                                                     |
|                        | Split File                                                                                      | <none>                                                                                                                     |
|                        | N of Rows in Working Data File                                                                  | 6                                                                                                                          |
| Missing Value Handling | Definition of Missing                                                                           | User defined missing values are treated as missing.                                                                        |
|                        | Cases Used                                                                                      | Statistics for each analysis are based on the cases with no missing or out-of-range data for any variable in the analysis. |
| Syntax                 | T-TEST GROUPS=Formulation(1 2)<br>/MISSING=ANALYSIS<br>/VARIABLES=Release<br>/CRITERIA=CI(.95). |                                                                                                                            |
| Resources              | Processor Time                                                                                  | 00:00:00.00                                                                                                                |
|                        | Elapsed Time                                                                                    | 00:00:00.00                                                                                                                |

**Group Statistics**

|         | Formulation | N | Mean    | Std. Deviation | Std. Error Mean |
|---------|-------------|---|---------|----------------|-----------------|
| Release | BSA ph5     | 3 | 46.0667 | 3.57258        | 2.06263         |
|         | BSA ph7.4   | 3 | 37.0000 | 2.00000        | 1.15470         |

**Independent Samples Test**

|         |                             | Levene's Test for Equality of Variances |      | t-test for Equality of Means |       |
|---------|-----------------------------|-----------------------------------------|------|------------------------------|-------|
|         |                             | F                                       | Sig. | t                            | df    |
| Release | Equal variances assumed     | 1.854                                   | .245 | 3.836                        | 4     |
|         | Equal variances not assumed |                                         |      | 3.836                        | 3.141 |

**Independent Samples Test**

|         |                             | t-test for Equality of Means |                 |                       |                    |
|---------|-----------------------------|------------------------------|-----------------|-----------------------|--------------------|
|         |                             | Sig. (2-tailed)              | Mean Difference | Std. Error Difference | 95% Confidence ... |
|         |                             |                              |                 |                       | Lower              |
| Release | Equal variances assumed     | .019                         | 9.06667         | 2.36385               | 2.50357            |
|         | Equal variances not assumed | .029                         | 9.06667         | 2.36385               | 1.73192            |

**Independent Samples Test**

|         |                             | t-test for Equality of Means       |
|---------|-----------------------------|------------------------------------|
|         |                             | 95% Confidence Interval of the ... |
|         |                             | Upper                              |
| Release | Equal variances assumed     | 15.62976                           |
|         | Equal variances not assumed | 16.40141                           |

```
T-TEST GROUPS=Formulation(1 2)
/MISSING=ANALYSIS
/VARIABLES=Release
/CRITERIA=CI(.95).
```

**T-Test 96h**

**Notes**

|                        |                                                                                                 |                                                                                                                            |
|------------------------|-------------------------------------------------------------------------------------------------|----------------------------------------------------------------------------------------------------------------------------|
| Output Created         | 12-JUL-2014 21:41:03                                                                            |                                                                                                                            |
| Comments               |                                                                                                 |                                                                                                                            |
| Input                  | Active Dataset                                                                                  | DataSet2                                                                                                                   |
|                        | Filter                                                                                          | <none>                                                                                                                     |
|                        | Weight                                                                                          | <none>                                                                                                                     |
|                        | Split File                                                                                      | <none>                                                                                                                     |
|                        | N of Rows in Working Data File                                                                  | 6                                                                                                                          |
| Missing Value Handling | Definition of Missing                                                                           | User defined missing values are treated as missing.                                                                        |
|                        | Cases Used                                                                                      | Statistics for each analysis are based on the cases with no missing or out-of-range data for any variable in the analysis. |
| Syntax                 | T-TEST GROUPS=Formulation(1 2)<br>/MISSING=ANALYSIS<br>/VARIABLES=Release<br>/CRITERIA=CI(.95). |                                                                                                                            |
| Resources              | Processor Time                                                                                  | 00:00:00.00                                                                                                                |
|                        | Elapsed Time                                                                                    | 00:00:00.00                                                                                                                |

**Group Statistics**

|         | Formulation | N | Mean    | Std. Deviation | Std. Error Mean |
|---------|-------------|---|---------|----------------|-----------------|
| Release | BSA ph5     | 3 | 53.0000 | 4.58258        | 2.64575         |
|         | BSA ph7.4   | 3 | 45.0000 | 2.64575        | 1.52753         |

**Independent Samples Test**

|         |                             | Levene's Test for Equality of Variances |      | t-test for Equality of Means |       |
|---------|-----------------------------|-----------------------------------------|------|------------------------------|-------|
|         |                             | F                                       | Sig. | t                            | df    |
| Release | Equal variances assumed     | 1.000                                   | .374 | 2.619                        | 4     |
|         | Equal variances not assumed |                                         |      | 2.619                        | 3.200 |

**Independent Samples Test**

|         |                             | t-test for Equality of Means |                 |                       |                    |
|---------|-----------------------------|------------------------------|-----------------|-----------------------|--------------------|
|         |                             | Sig. (2-tailed)              | Mean Difference | Std. Error Difference | 95% Confidence ... |
|         |                             |                              |                 |                       | Lower              |
| Release | Equal variances assumed     | .059                         | 8.00000         | 3.05505               | -.48218            |
|         | Equal variances not assumed | .074                         | 8.00000         | 3.05505               | -1.38765           |

**Independent Samples Test**

|         |                             | t-test for Equality of Means       |
|---------|-----------------------------|------------------------------------|
|         |                             | 95% Confidence Interval of the ... |
|         |                             | Upper                              |
| Release | Equal variances assumed     | 16.48218                           |
|         | Equal variances not assumed | 17.38765                           |

```
T-TEST GROUPS=Formulation(1 2)
/MISSING=ANALYSIS
/VARIABLES=Release
/CRITERIA=CI(.95).
```

**T-Test 120h**

**Notes**

|                        |                                                                                                 |                                                                                                                            |
|------------------------|-------------------------------------------------------------------------------------------------|----------------------------------------------------------------------------------------------------------------------------|
| Output Created         | 12-JUL-2014 21:42:51                                                                            |                                                                                                                            |
| Comments               |                                                                                                 |                                                                                                                            |
| Input                  | Active Dataset                                                                                  | DataSet2                                                                                                                   |
|                        | Filter                                                                                          | <none>                                                                                                                     |
|                        | Weight                                                                                          | <none>                                                                                                                     |
|                        | Split File                                                                                      | <none>                                                                                                                     |
|                        | N of Rows in Working Data File                                                                  | 6                                                                                                                          |
| Missing Value Handling | Definition of Missing                                                                           | User defined missing values are treated as missing.                                                                        |
|                        | Cases Used                                                                                      | Statistics for each analysis are based on the cases with no missing or out-of-range data for any variable in the analysis. |
| Syntax                 | T-TEST GROUPS=Formulation(1 2)<br>/MISSING=ANALYSIS<br>/VARIABLES=Release<br>/CRITERIA=CI(.95). |                                                                                                                            |
| Resources              | Processor Time                                                                                  | 00:00:00.00                                                                                                                |
|                        | Elapsed Time                                                                                    | 00:00:00.01                                                                                                                |

**Group Statistics**

|         | Formulation | N | Mean    | Std. Deviation | Std. Error Mean |
|---------|-------------|---|---------|----------------|-----------------|
| Release | BSA ph5     | 3 | 55.0000 | 3.46410        | 2.00000         |
|         | BSA ph7.4   | 3 | 47.0667 | 2.90057        | 1.67465         |

**Independent Samples Test**

|         |                             | Levene's Test for Equality of Variances |      | t-test for Equality of Means |       |
|---------|-----------------------------|-----------------------------------------|------|------------------------------|-------|
|         |                             | F                                       | Sig. | t                            | df    |
| Release | Equal variances assumed     | .378                                    | .572 | 3.041                        | 4     |
|         | Equal variances not assumed |                                         |      | 3.041                        | 3.880 |

### Independent Samples Test

|         |                             | t-test for Equality of Means |                 |                       |                    |
|---------|-----------------------------|------------------------------|-----------------|-----------------------|--------------------|
|         |                             | Sig. (2-tailed)              | Mean Difference | Std. Error Difference | 95% Confidence ... |
|         |                             |                              |                 |                       | Lower              |
| Release | Equal variances assumed     | .038                         | 7.93333         | 2.60853               | .69088             |
|         | Equal variances not assumed | .040                         | 7.93333         | 2.60853               | .60185             |

### Independent Samples Test

|         |                             | t-test for Equality of Means       |
|---------|-----------------------------|------------------------------------|
|         |                             | 95% Confidence Interval of the ... |
|         |                             | Upper                              |
| Release | Equal variances assumed     | 15.17578                           |
|         | Equal variances not assumed | 15.26482                           |

```
T-TEST GROUPS=Formulation(1 2)
/MISSING=ANALYSIS
/VARIABLES=Release
/CRITERIA=CI(.95).
```

## T-Test 216h



**Notes**

|                        |                                                                                                 |                                                                                                                            |
|------------------------|-------------------------------------------------------------------------------------------------|----------------------------------------------------------------------------------------------------------------------------|
| Output Created         | 12-JUL-2014 21:44:59                                                                            |                                                                                                                            |
| Comments               |                                                                                                 |                                                                                                                            |
| Input                  | Active Dataset                                                                                  | DataSet2                                                                                                                   |
|                        | Filter                                                                                          | <none>                                                                                                                     |
|                        | Weight                                                                                          | <none>                                                                                                                     |
|                        | Split File                                                                                      | <none>                                                                                                                     |
|                        | N of Rows in Working Data File                                                                  | 6                                                                                                                          |
| Missing Value Handling | Definition of Missing                                                                           | User defined missing values are treated as missing.                                                                        |
|                        | Cases Used                                                                                      | Statistics for each analysis are based on the cases with no missing or out-of-range data for any variable in the analysis. |
| Syntax                 | T-TEST GROUPS=Formulation(1 2)<br>/MISSING=ANALYSIS<br>/VARIABLES=Release<br>/CRITERIA=CI(.95). |                                                                                                                            |
| Resources              | Processor Time                                                                                  | 00:00:00.00                                                                                                                |
|                        | Elapsed Time                                                                                    | 00:00:00.01                                                                                                                |

**Group Statistics**

|         | Formulation | N | Mean    | Std. Deviation | Std. Error Mean |
|---------|-------------|---|---------|----------------|-----------------|
| Release | BSA ph5     | 3 | 62.0000 | 2.00000        | 1.15470         |
|         | BSA ph7.4   | 3 | 54.0000 | 2.00000        | 1.15470         |

**Independent Samples Test**

|         |                             | Levene's Test for Equality of Variances |       | t-test for Equality of Means |       |
|---------|-----------------------------|-----------------------------------------|-------|------------------------------|-------|
|         |                             | F                                       | Sig.  | t                            | df    |
| Release | Equal variances assumed     | .000                                    | 1.000 | 4.899                        | 4     |
|         | Equal variances not assumed |                                         |       | 4.899                        | 4.000 |

**Independent Samples Test**

|         |                             | t-test for Equality of Means |                 |                       |                    |
|---------|-----------------------------|------------------------------|-----------------|-----------------------|--------------------|
|         |                             | Sig. (2-tailed)              | Mean Difference | Std. Error Difference | 95% Confidence ... |
|         |                             |                              |                 |                       | Lower              |
| Release | Equal variances assumed     | .008                         | 8.00000         | 1.63299               | 3.46608            |
|         | Equal variances not assumed | .008                         | 8.00000         | 1.63299               | 3.46608            |

**Independent Samples Test**

|         |                             | t-test for Equality of Means       |
|---------|-----------------------------|------------------------------------|
|         |                             | 95% Confidence Interval of the ... |
|         |                             | Upper                              |
| Release | Equal variances assumed     | 12.53392                           |
|         | Equal variances not assumed | 12.53392                           |
