# Supplementary material for: Nanoscale Diblock Copolymer Micelles: Characterizations and Estimation of the Effective Diffusion Coefficients of Biomolecules Release through Cylindrical Diffusion Model
Source: PubMed Central journal article supplement (PMC4136833; doi:10.1371/journal.pone.0105234), 2014-08-18
Supplement: pone.0105234.s002.pdf [file pone.0105234.s002.pdf]

```

DATASET ACTIVATE DataSet2.
T-TEST GROUPS=Formulation(1 2)
  /MISSING=ANALYSIS
  /VARIABLES=Release
  /CRITERIA=CI(.95).

```

## T-Test 0h

### Notes

|                        |                                |                                                                                                                            |
|------------------------|--------------------------------|----------------------------------------------------------------------------------------------------------------------------|
| Output Created         |                                | 12-JUL-2014 21:57:42                                                                                                       |
| Comments               |                                |                                                                                                                            |
| Input                  | Active Dataset                 | DataSet2                                                                                                                   |
|                        | Filter                         | <none>                                                                                                                     |
|                        | Weight                         | <none>                                                                                                                     |
|                        | Split File                     | <none>                                                                                                                     |
|                        | N of Rows in Working Data File | 6                                                                                                                          |
| Missing Value Handling | Definition of Missing          | User defined missing values are treated as missing.                                                                        |
|                        | Cases Used                     | Statistics for each analysis are based on the cases with no missing or out-of-range data for any variable in the analysis. |
| Syntax                 |                                | T-TEST GROUPS=Formulation(1 2)<br>/MISSING=ANALYSIS<br>/VARIABLES=Release<br>/CRITERIA=CI(.95).                            |
| Resources              | Processor Time                 | 00:00:00.00                                                                                                                |
|                        | Elapsed Time                   | 00:00:00.01                                                                                                                |

[DataSet2]

### Group Statistics

|         | Formulation | N | Mean   | Std. Deviation | Std. Error Mean |
|---------|-------------|---|--------|----------------|-----------------|
| Release | siRNA ph5   | 3 | 3.0000 | 2.29129        | 1.32288         |
|         | siRNA ph7.4 | 3 | 1.5000 | .87178         | .50332          |

**Independent Samples Test**

|         |                             | Levene's Test for Equality of Variances |      | t-test for Equality of Means |       |
|---------|-----------------------------|-----------------------------------------|------|------------------------------|-------|
|         |                             | F                                       | Sig. | t                            | df    |
| Release | Equal variances assumed     | 2.550                                   | .186 | 1.060                        | 4     |
|         | Equal variances not assumed |                                         |      | 1.060                        | 2.567 |

**Independent Samples Test**

|         |                             | t-test for Equality of Means |                 |                       |                    |
|---------|-----------------------------|------------------------------|-----------------|-----------------------|--------------------|
|         |                             | Sig. (2-tailed)              | Mean Difference | Std. Error Difference | 95% Confidence ... |
|         |                             |                              |                 |                       | Lower              |
| Release | Equal variances assumed     | .349                         | 1.50000         | 1.41539               | -2.42976           |
|         | Equal variances not assumed | .379                         | 1.50000         | 1.41539               | -3.46608           |

**Independent Samples Test**

|         |                             | t-test for Equality of Means       |
|---------|-----------------------------|------------------------------------|
|         |                             | 95% Confidence Interval of the ... |
|         |                             | Upper                              |
| Release | Equal variances assumed     | 5.42976                            |
|         | Equal variances not assumed | 6.46608                            |

```
T-TEST GROUPS=Formulation(1 2)
/MISSING=ANALYSIS
/VARIABLES=Release
/CRITERIA=CI(.95).
```

**T-Test 1h**

**Notes**

|                        |                                                                                                 |                                                                                                                            |
|------------------------|-------------------------------------------------------------------------------------------------|----------------------------------------------------------------------------------------------------------------------------|
| Output Created         | 12-JUL-2014 21:59:26                                                                            |                                                                                                                            |
| Comments               |                                                                                                 |                                                                                                                            |
| Input                  | Active Dataset                                                                                  | DataSet2                                                                                                                   |
|                        | Filter                                                                                          | <none>                                                                                                                     |
|                        | Weight                                                                                          | <none>                                                                                                                     |
|                        | Split File                                                                                      | <none>                                                                                                                     |
|                        | N of Rows in Working Data File                                                                  | 6                                                                                                                          |
| Missing Value Handling | Definition of Missing                                                                           | User defined missing values are treated as missing.                                                                        |
|                        | Cases Used                                                                                      | Statistics for each analysis are based on the cases with no missing or out-of-range data for any variable in the analysis. |
| Syntax                 | T-TEST GROUPS=Formulation(1 2)<br>/MISSING=ANALYSIS<br>/VARIABLES=Release<br>/CRITERIA=CI(.95). |                                                                                                                            |
| Resources              | Processor Time                                                                                  | 00:00:00.02                                                                                                                |
|                        | Elapsed Time                                                                                    | 00:00:00.01                                                                                                                |

**Group Statistics**

|         | Formulation | N | Mean    | Std. Deviation | Std. Error Mean |
|---------|-------------|---|---------|----------------|-----------------|
| Release | siRNA ph5   | 3 | 25.0000 | 3.60555        | 2.08167         |
|         | siRNA ph7.4 | 3 | 18.0000 | 2.05183        | 1.18462         |

**Independent Samples Test**

|         |                             | Levene's Test for Equality of Variances |      | t-test for Equality of Means |       |
|---------|-----------------------------|-----------------------------------------|------|------------------------------|-------|
|         |                             | F                                       | Sig. | t                            | df    |
| Release | Equal variances assumed     | 1.336                                   | .312 | 2.923                        | 4     |
|         | Equal variances not assumed |                                         |      | 2.923                        | 3.172 |

**Independent Samples Test**

|         |                             | t-test for Equality of Means |                 |                       |                    |
|---------|-----------------------------|------------------------------|-----------------|-----------------------|--------------------|
|         |                             | Sig. (2-tailed)              | Mean Difference | Std. Error Difference | 95% Confidence ... |
|         |                             |                              |                 |                       | Lower              |
| Release | Equal variances assumed     | .043                         | 7.00000         | 2.39513               | .35004             |
|         | Equal variances not assumed | .057                         | 7.00000         | 2.39513               | -.39329            |

**Independent Samples Test**

|         |                             | t-test for Equality of Means       |
|---------|-----------------------------|------------------------------------|
|         |                             | 95% Confidence Interval of the ... |
|         |                             | Upper                              |
| Release | Equal variances assumed     | 13.64996                           |
|         | Equal variances not assumed | 14.39329                           |

```
T-TEST GROUPS=Formulation(1 2)
/MISSING=ANALYSIS
/VARIABLES=Release
/CRITERIA=CI(.95).
```

**T-Test 3h**

**Notes**

|                        |                                                                                                 |                                                                                                                            |
|------------------------|-------------------------------------------------------------------------------------------------|----------------------------------------------------------------------------------------------------------------------------|
| Output Created         | 12-JUL-2014 22:00:37                                                                            |                                                                                                                            |
| Comments               |                                                                                                 |                                                                                                                            |
| Input                  | Active Dataset                                                                                  | DataSet2                                                                                                                   |
|                        | Filter                                                                                          | <none>                                                                                                                     |
|                        | Weight                                                                                          | <none>                                                                                                                     |
|                        | Split File                                                                                      | <none>                                                                                                                     |
|                        | N of Rows in Working Data File                                                                  | 6                                                                                                                          |
| Missing Value Handling | Definition of Missing                                                                           | User defined missing values are treated as missing.                                                                        |
|                        | Cases Used                                                                                      | Statistics for each analysis are based on the cases with no missing or out-of-range data for any variable in the analysis. |
| Syntax                 | T-TEST GROUPS=Formulation(1 2)<br>/MISSING=ANALYSIS<br>/VARIABLES=Release<br>/CRITERIA=CI(.95). |                                                                                                                            |
| Resources              | Processor Time                                                                                  | 00:00:00.02                                                                                                                |
|                        | Elapsed Time                                                                                    | 00:00:00.01                                                                                                                |

**Group Statistics**

|         | Formulation | N | Mean    | Std. Deviation | Std. Error Mean |
|---------|-------------|---|---------|----------------|-----------------|
| Release | siRNA ph5   | 3 | 36.0000 | 4.00000        | 2.30940         |
|         | siRNA ph7.4 | 3 | 28.0000 | 1.00000        | .57735          |

**Independent Samples Test**

|         |                             | Levene's Test for Equality of Variances |      | t-test for Equality of Means |       |
|---------|-----------------------------|-----------------------------------------|------|------------------------------|-------|
|         |                             | F                                       | Sig. | t                            | df    |
| Release | Equal variances assumed     | 2.118                                   | .219 | 3.361                        | 4     |
|         | Equal variances not assumed |                                         |      | 3.361                        | 2.249 |

### Independent Samples Test

|         |                             | t-test for Equality of Means |                 |                       |                    |
|---------|-----------------------------|------------------------------|-----------------|-----------------------|--------------------|
|         |                             | Sig. (2-tailed)              | Mean Difference | Std. Error Difference | 95% Confidence ... |
|         |                             |                              |                 |                       | Lower              |
| Release | Equal variances assumed     | .028                         | 8.00000         | 2.38048               | 1.39074            |
|         | Equal variances not assumed | .066                         | 8.00000         | 2.38048               | -1.22876           |

### Independent Samples Test

|         |                             | t-test for Equality of Means       |
|---------|-----------------------------|------------------------------------|
|         |                             | 95% Confidence Interval of the ... |
|         |                             | Upper                              |
| Release | Equal variances assumed     | 14.60926                           |
|         | Equal variances not assumed | 17.22876                           |

```
T-TEST GROUPS=Formulation(1 2)
/MISSING=ANALYSIS
/VARIABLES=Release
/CRITERIA=CI(.95).
```

## T-Test 4h

### Group Statistics

|         | Formulation | N | Mean    | Std. Deviation | Std. Error Mean |
|---------|-------------|---|---------|----------------|-----------------|
| Release | siRNA ph5   | 3 | 43.0000 | 1.00000        | .57735          |
|         | siRNA ph7.4 | 3 | 36.0000 | 3.60555        | 2.08167         |

**Notes**

|                        |                                                                                                 |                                                                                                                            |
|------------------------|-------------------------------------------------------------------------------------------------|----------------------------------------------------------------------------------------------------------------------------|
| Output Created         | 12-JUL-2014 22:02:12                                                                            |                                                                                                                            |
| Comments               |                                                                                                 |                                                                                                                            |
| Input                  | Active Dataset                                                                                  | DataSet2                                                                                                                   |
|                        | Filter                                                                                          | <none>                                                                                                                     |
|                        | Weight                                                                                          | <none>                                                                                                                     |
|                        | Split File                                                                                      | <none>                                                                                                                     |
|                        | N of Rows in Working Data File                                                                  | 6                                                                                                                          |
| Missing Value Handling | Definition of Missing                                                                           | User defined missing values are treated as missing.                                                                        |
|                        | Cases Used                                                                                      | Statistics for each analysis are based on the cases with no missing or out-of-range data for any variable in the analysis. |
| Syntax                 | T-TEST GROUPS=Formulation(1 2)<br>/MISSING=ANALYSIS<br>/VARIABLES=Release<br>/CRITERIA=CI(.95). |                                                                                                                            |
| Resources              | Processor Time                                                                                  | 00:00:00.03                                                                                                                |
|                        | Elapsed Time                                                                                    | 00:00:00.01                                                                                                                |

**Independent Samples Test**

|         |                             | Levene's Test for Equality of Variances |      | t-test for Equality of Means |       |
|---------|-----------------------------|-----------------------------------------|------|------------------------------|-------|
|         |                             | F                                       | Sig. | t                            | df    |
| Release | Equal variances assumed     | 4.500                                   | .101 | 3.240                        | 4     |
|         | Equal variances not assumed |                                         |      | 3.240                        | 2.306 |

**Independent Samples Test**

|         |                             | t-test for Equality of Means |                 |                       |                    |
|---------|-----------------------------|------------------------------|-----------------|-----------------------|--------------------|
|         |                             | Sig. (2-tailed)              | Mean Difference | Std. Error Difference | 95% Confidence ... |
|         |                             |                              |                 |                       | Lower              |
| Release | Equal variances assumed     | .032                         | 7.00000         | 2.16025               | 1.00219            |
|         | Equal variances not assumed | .069                         | 7.00000         | 2.16025               | -1.20770           |

**Independent Samples Test**

|         |                             |                                    |
|---------|-----------------------------|------------------------------------|
|         |                             | t-test for Equality of Means       |
|         |                             | 95% Confidence Interval of the ... |
|         |                             | Upper                              |
| Release | Equal variances assumed     | 12.99781                           |
|         | Equal variances not assumed | 15.20770                           |

```
T-TEST GROUPS=Formulation(1 2)
/MISSING=ANALYSIS
/VARIABLES=Release
/CRITERIA=CI(.95).
```

**T-Test 24h**

**Notes**

|                        |                                |                                                                                                                            |
|------------------------|--------------------------------|----------------------------------------------------------------------------------------------------------------------------|
| Output Created         |                                | 12-JUL-2014 22:03:34                                                                                                       |
| Comments               |                                |                                                                                                                            |
| Input                  | Active Dataset                 | DataSet2                                                                                                                   |
|                        | Filter                         | <none>                                                                                                                     |
|                        | Weight                         | <none>                                                                                                                     |
|                        | Split File                     | <none>                                                                                                                     |
|                        | N of Rows in Working Data File | 6                                                                                                                          |
| Missing Value Handling | Definition of Missing          | User defined missing values are treated as missing.                                                                        |
|                        | Cases Used                     | Statistics for each analysis are based on the cases with no missing or out-of-range data for any variable in the analysis. |
| Syntax                 |                                | T-TEST GROUPS=Formulation(1 2)<br>/MISSING=ANALYSIS<br>/VARIABLES=Release<br>/CRITERIA=CI(.95).                            |
| Resources              | Processor Time                 | 00:00:00.00                                                                                                                |
|                        | Elapsed Time                   | 00:00:00.01                                                                                                                |



**Group Statistics**

| Formulation |             | N | Mean    | Std. Deviation | Std. Error Mean |
|-------------|-------------|---|---------|----------------|-----------------|
| Release     | siRNA ph5   | 3 | 52.0000 | 2.64575        | 1.52753         |
|             | siRNA ph7.4 | 3 | 45.0333 | 3.22542        | 1.86220         |

**Independent Samples Test**

|         |                             | Levene's Test for Equality of Variances |      | t-test for Equality of Means |       |
|---------|-----------------------------|-----------------------------------------|------|------------------------------|-------|
|         |                             | F                                       | Sig. | t                            | df    |
| Release | Equal variances assumed     | .071                                    | .804 | 2.892                        | 4     |
|         | Equal variances not assumed |                                         |      | 2.892                        | 3.853 |

**Independent Samples Test**

|         |                             | t-test for Equality of Means |                 |                       |                                           |
|---------|-----------------------------|------------------------------|-----------------|-----------------------|-------------------------------------------|
|         |                             | Sig. (2-tailed)              | Mean Difference | Std. Error Difference | 95% Confidence Interval of the Difference |
|         |                             |                              |                 |                       | Lower                                     |
| Release | Equal variances assumed     | .044                         | 6.96667         | 2.40855               | .27946                                    |
|         | Equal variances not assumed | .047                         | 6.96667         | 2.40855               | .17739                                    |

**Independent Samples Test**

|         |                             | t-test for Equality of Means              |
|---------|-----------------------------|-------------------------------------------|
|         |                             | 95% Confidence Interval of the Difference |
|         |                             | Upper                                     |
| Release | Equal variances assumed     | 13.65387                                  |
|         | Equal variances not assumed | 13.75595                                  |

```
T-TEST GROUPS=Formulation(1 2)
/MISSING=ANALYSIS
/VARIABLES=Release
/CRITERIA=CI(.95).
```

**Notes**

|                        |                                                                                                 |                                                                                                                            |
|------------------------|-------------------------------------------------------------------------------------------------|----------------------------------------------------------------------------------------------------------------------------|
| Output Created         | 12-JUL-2014 22:04:39                                                                            |                                                                                                                            |
| Comments               |                                                                                                 |                                                                                                                            |
| Input                  | Active Dataset                                                                                  | DataSet2                                                                                                                   |
|                        | Filter                                                                                          | <none>                                                                                                                     |
|                        | Weight                                                                                          | <none>                                                                                                                     |
|                        | Split File                                                                                      | <none>                                                                                                                     |
|                        | N of Rows in Working Data File                                                                  | 6                                                                                                                          |
| Missing Value Handling | Definition of Missing                                                                           | User defined missing values are treated as missing.                                                                        |
|                        | Cases Used                                                                                      | Statistics for each analysis are based on the cases with no missing or out-of-range data for any variable in the analysis. |
| Syntax                 | T-TEST GROUPS=Formulation(1 2)<br>/MISSING=ANALYSIS<br>/VARIABLES=Release<br>/CRITERIA=CI(.95). |                                                                                                                            |
| Resources              | Processor Time                                                                                  | 00:00:00.02                                                                                                                |
|                        | Elapsed Time                                                                                    | 00:00:00.01                                                                                                                |

**Group Statistics**

|         | Formulation | N | Mean    | Std. Deviation | Std. Error Mean |
|---------|-------------|---|---------|----------------|-----------------|
| Release | siRNA ph5   | 3 | 58.0000 | 4.35890        | 2.51661         |
|         | siRNA ph7.4 | 3 | 50.0000 | 2.69072        | 1.55349         |

**Independent Samples Test**

|         |                             | Levene's Test for Equality of Variances |      | t-test for Equality of Means |       |
|---------|-----------------------------|-----------------------------------------|------|------------------------------|-------|
|         |                             | F                                       | Sig. | t                            | df    |
| Release | Equal variances assumed     | 1.493                                   | .289 | 2.705                        | 4     |
|         | Equal variances not assumed |                                         |      | 2.705                        | 3.331 |

**Independent Samples Test**

|         |                             | t-test for Equality of Means |                 |                       |                    |
|---------|-----------------------------|------------------------------|-----------------|-----------------------|--------------------|
|         |                             | Sig. (2-tailed)              | Mean Difference | Std. Error Difference | 95% Confidence ... |
|         |                             |                              |                 |                       | Lower              |
| Release | Equal variances assumed     | .054                         | 8.00000         | 2.95748               | -.21127            |
|         | Equal variances not assumed | .066                         | 8.00000         | 2.95748               | -.90447            |

**Independent Samples Test**

|         |                             | t-test for Equality of Means       |
|---------|-----------------------------|------------------------------------|
|         |                             | 95% Confidence Interval of the ... |
|         |                             | Upper                              |
| Release | Equal variances assumed     | 16.21127                           |
|         | Equal variances not assumed | 16.90447                           |

```
T-TEST GROUPS=Formulation(1 2)
/MISSING=ANALYSIS
/VARIABLES=Release
/CRITERIA=CI(.95).
```

**T-Test 91h**

**Notes**

|                        |                                                                                                 |                                                                                                                            |
|------------------------|-------------------------------------------------------------------------------------------------|----------------------------------------------------------------------------------------------------------------------------|
| Output Created         | 12-JUL-2014 22:05:49                                                                            |                                                                                                                            |
| Comments               |                                                                                                 |                                                                                                                            |
| Input                  | Active Dataset                                                                                  | DataSet2                                                                                                                   |
|                        | Filter                                                                                          | <none>                                                                                                                     |
|                        | Weight                                                                                          | <none>                                                                                                                     |
|                        | Split File                                                                                      | <none>                                                                                                                     |
|                        | N of Rows in Working Data File                                                                  | 6                                                                                                                          |
| Missing Value Handling | Definition of Missing                                                                           | User defined missing values are treated as missing.                                                                        |
|                        | Cases Used                                                                                      | Statistics for each analysis are based on the cases with no missing or out-of-range data for any variable in the analysis. |
| Syntax                 | T-TEST GROUPS=Formulation(1 2)<br>/MISSING=ANALYSIS<br>/VARIABLES=Release<br>/CRITERIA=CI(.95). |                                                                                                                            |
| Resources              | Processor Time                                                                                  | 00:00:00.00                                                                                                                |
|                        | Elapsed Time                                                                                    | 00:00:00.01                                                                                                                |

**Group Statistics**

|         | Formulation | N | Mean    | Std. Deviation | Std. Error Mean |
|---------|-------------|---|---------|----------------|-----------------|
| Release | siRNA ph5   | 3 | 65.0000 | 5.00000        | 2.88675         |
|         | siRNA ph7.4 | 3 | 56.0000 | 4.58258        | 2.64575         |

**Independent Samples Test**

|         |                             | Levene's Test for Equality of Variances |       | t-test for Equality of Means |       |
|---------|-----------------------------|-----------------------------------------|-------|------------------------------|-------|
|         |                             | F                                       | Sig.  | t                            | df    |
| Release | Equal variances assumed     | .000                                    | 1.000 | 2.298                        | 4     |
|         | Equal variances not assumed |                                         |       | 2.298                        | 3.970 |

**Independent Samples Test**

|         |                             | t-test for Equality of Means |                 |                       |                    |
|---------|-----------------------------|------------------------------|-----------------|-----------------------|--------------------|
|         |                             | Sig. (2-tailed)              | Mean Difference | Std. Error Difference | 95% Confidence ... |
|         |                             |                              |                 |                       | Lower              |
| Release | Equal variances assumed     | .083                         | 9.00000         | 3.91578               | -1.87195           |
|         | Equal variances not assumed | .084                         | 9.00000         | 3.91578               | -1.90445           |

**Independent Samples Test**

|         |                             | t-test for Equality of Means       |
|---------|-----------------------------|------------------------------------|
|         |                             | 95% Confidence Interval of the ... |
|         |                             | Upper                              |
| Release | Equal variances assumed     | 19.87195                           |
|         | Equal variances not assumed | 19.90445                           |

```
T-TEST GROUPS=Formulation(1 2)
/MISSING=ANALYSIS
/VARIABLES=Release
/CRITERIA=CI(.95).
```

**T-Test 115 h**

**Notes**

|                        |                                                                                                 |                                                                                                                            |
|------------------------|-------------------------------------------------------------------------------------------------|----------------------------------------------------------------------------------------------------------------------------|
| Output Created         | 12-JUL-2014 22:07:21                                                                            |                                                                                                                            |
| Comments               |                                                                                                 |                                                                                                                            |
| Input                  | Active Dataset                                                                                  | DataSet2                                                                                                                   |
|                        | Filter                                                                                          | <none>                                                                                                                     |
|                        | Weight                                                                                          | <none>                                                                                                                     |
|                        | Split File                                                                                      | <none>                                                                                                                     |
|                        | N of Rows in Working Data File                                                                  | 6                                                                                                                          |
| Missing Value Handling | Definition of Missing                                                                           | User defined missing values are treated as missing.                                                                        |
|                        | Cases Used                                                                                      | Statistics for each analysis are based on the cases with no missing or out-of-range data for any variable in the analysis. |
| Syntax                 | T-TEST GROUPS=Formulation(1 2)<br>/MISSING=ANALYSIS<br>/VARIABLES=Release<br>/CRITERIA=CI(.95). |                                                                                                                            |
| Resources              | Processor Time                                                                                  | 00:00:00.00                                                                                                                |
|                        | Elapsed Time                                                                                    | 00:00:00.00                                                                                                                |

**Group Statistics**

|         | Formulation | N | Mean    | Std. Deviation | Std. Error Mean |
|---------|-------------|---|---------|----------------|-----------------|
| Release | siRNA ph5   | 3 | 68.0000 | 2.64575        | 1.52753         |
|         | siRNA ph7.4 | 3 | 58.0000 | 4.85695        | 2.80416         |

**Independent Samples Test**

|         |                             | Levene's Test for Equality of Variances |      | t-test for Equality of Means |       |
|---------|-----------------------------|-----------------------------------------|------|------------------------------|-------|
|         |                             | F                                       | Sig. | t                            | df    |
| Release | Equal variances assumed     | .673                                    | .458 | 3.132                        | 4     |
|         | Equal variances not assumed |                                         |      | 3.132                        | 3.091 |

**Independent Samples Test**

|         |                             | t-test for Equality of Means |                 |                       |                    |
|---------|-----------------------------|------------------------------|-----------------|-----------------------|--------------------|
|         |                             | Sig. (2-tailed)              | Mean Difference | Std. Error Difference | 95% Confidence ... |
|         |                             |                              |                 |                       | Lower              |
| Release | Equal variances assumed     | .035                         | 10.00000        | 3.19322               | 1.13419            |
|         | Equal variances not assumed | .050                         | 10.00000        | 3.19322               | .00472             |

**Independent Samples Test**

|         |                             | t-test for Equality of Means       |
|---------|-----------------------------|------------------------------------|
|         |                             | 95% Confidence Interval of the ... |
|         |                             | Upper                              |
| Release | Equal variances assumed     | 18.86581                           |
|         | Equal variances not assumed | 19.99528                           |

```
T-TEST GROUPS=Formulation(1 2)
/MISSING=ANALYSIS
/VARIABLES=Release
/CRITERIA=CI(.95).
```

**T-Test 215 h**

**Notes**

|                        |                                                                                                 |                                                                                                                            |
|------------------------|-------------------------------------------------------------------------------------------------|----------------------------------------------------------------------------------------------------------------------------|
| Output Created         | 12-JUL-2014 22:08:34                                                                            |                                                                                                                            |
| Comments               |                                                                                                 |                                                                                                                            |
| Input                  | Active Dataset                                                                                  | DataSet2                                                                                                                   |
|                        | Filter                                                                                          | <none>                                                                                                                     |
|                        | Weight                                                                                          | <none>                                                                                                                     |
|                        | Split File                                                                                      | <none>                                                                                                                     |
|                        | N of Rows in Working Data File                                                                  | 6                                                                                                                          |
| Missing Value Handling | Definition of Missing                                                                           | User defined missing values are treated as missing.                                                                        |
|                        | Cases Used                                                                                      | Statistics for each analysis are based on the cases with no missing or out-of-range data for any variable in the analysis. |
| Syntax                 | T-TEST GROUPS=Formulation(1 2)<br>/MISSING=ANALYSIS<br>/VARIABLES=Release<br>/CRITERIA=CI(.95). |                                                                                                                            |
| Resources              | Processor Time                                                                                  | 00:00:00.02                                                                                                                |
|                        | Elapsed Time                                                                                    | 00:00:00.01                                                                                                                |

**Group Statistics**

|         | Formulation | N | Mean    | Std. Deviation | Std. Error Mean |
|---------|-------------|---|---------|----------------|-----------------|
| Release | siRNA ph5   | 3 | 75.0000 | 1.73494        | 1.00167         |
|         | siRNA ph7.4 | 3 | 63.0000 | 2.00000        | 1.15470         |

**Independent Samples Test**

|         |                             | Levene's Test for Equality of Variances |       | t-test for Equality of Means |       |
|---------|-----------------------------|-----------------------------------------|-------|------------------------------|-------|
|         |                             | F                                       | Sig.  | t                            | df    |
| Release | Equal variances assumed     | .000                                    | 1.000 | 7.850                        | 4     |
|         | Equal variances not assumed |                                         |       | 7.850                        | 3.922 |



**Independent Samples Test**

|         |                             | t-test for Equality of Means |                 |                       |                    |
|---------|-----------------------------|------------------------------|-----------------|-----------------------|--------------------|
|         |                             | Sig. (2-tailed)              | Mean Difference | Std. Error Difference | 95% Confidence ... |
|         |                             |                              |                 |                       | Lower              |
| Release | Equal variances assumed     | .001                         | 12.00000        | 1.52862               | 7.75588            |
|         | Equal variances not assumed | .002                         | 12.00000        | 1.52862               | 7.72229            |

**Independent Samples Test**

|         |                             | t-test for Equality of Means       |
|---------|-----------------------------|------------------------------------|
|         |                             | 95% Confidence Interval of the ... |
|         |                             | Upper                              |
| Release | Equal variances assumed     | 16.24412                           |
|         | Equal variances not assumed | 16.27771                           |
