# Supplementary material for: Nanoscale Diblock Copolymer Micelles: Characterizations and Estimation of the Effective Diffusion Coefficients of Biomolecules Release through Cylindrical Diffusion Model
Source: PubMed Central journal article supplement (PMC4136833; doi:10.1371/journal.pone.0105234), 2014-08-18
Supplement: pone.0105234.s004.pdf [file pone.0105234.s004.pdf]

```

ONEWAY T1 BY F
/MISSING ANALYSIS
/POSTHOC=TUKEY ALPHA(0.05).

```

## Oneway

### Notes

|                        |                                                                    |                                                                                                        |
|------------------------|--------------------------------------------------------------------|--------------------------------------------------------------------------------------------------------|
| Output Created         | 08-SEP-2013 19:20:57                                               |                                                                                                        |
| Comments               |                                                                    |                                                                                                        |
| Input                  | Active Dataset                                                     | DataSet1                                                                                               |
|                        | Filter                                                             | <none>                                                                                                 |
|                        | Weight                                                             | <none>                                                                                                 |
|                        | Split File                                                         | <none>                                                                                                 |
|                        | N of Rows in Working Data File                                     | 30                                                                                                     |
| Missing Value Handling | Definition of Missing                                              | User-defined missing values are treated as missing.                                                    |
|                        | Cases Used                                                         | Statistics for each analysis are based on cases with no missing data for any variable in the analysis. |
| Syntax                 | ONEWAY T1 BY F<br>/MISSING ANALYSIS<br>/POSTHOC=TUKEY ALPHA(0.05). |                                                                                                        |
| Resources              | Processor Time                                                     | 00:00:00.05                                                                                            |
|                        | Elapsed Time                                                       | 00:00:00.03                                                                                            |

[DataSet1]

### ANOVA

T1

|                | Sum of Squares | df | Mean Square | F     | Sig. |
|----------------|----------------|----|-------------|-------|------|
| Between Groups | 200.300        | 9  | 22.256      | 1.932 | .106 |
| Within Groups  | 230.367        | 20 | 11.518      |       |      |
| Total          | 430.667        | 29 |             |       |      |

## Post Hoc Tests

**Multiple Comparisons**

Dependent Variable: T1

Tukey HSD

| (I) F     | (J) F     | Mean Difference (I-J) | Std. Error | Sig.  | 95% Confidence Interval |             |
|-----------|-----------|-----------------------|------------|-------|-------------------------|-------------|
|           |           |                       |            |       | Lower Bound             | Upper Bound |
| UNTREAT   | BLANK RNA | 5.00000               | 2.77108    | .726  | -4.8127                 | 14.8127     |
|           | BLANK MIC | .00000                | 2.77108    | 1.000 | -9.8127                 | 9.8127      |
|           | SIRNA1:1  | 4.66667               | 2.77108    | .792  | -5.1460                 | 14.4794     |
|           | sIRNA1:3  | 8.00000               | 2.77108    | .174  | -1.8127                 | 17.8127     |
|           | sIRNA3:1  | 1.00000               | 2.77108    | 1.000 | -8.8127                 | 10.8127     |
|           | BSA1:1    | 1.00000               | 2.77108    | 1.000 | -8.8127                 | 10.8127     |
|           | BSA1:3    | 3.00000               | 2.77108    | .981  | -6.8127                 | 12.8127     |
|           | BSA3:1    | 1.00000               | 2.77108    | 1.000 | -8.8127                 | 10.8127     |
|           | BLANK BSA | .00000                | 2.77108    | 1.000 | -9.8127                 | 9.8127      |
| BLANK RNA | UNTREAT   | -5.00000              | 2.77108    | .726  | -14.8127                | 4.8127      |
|           | BLANK MIC | -5.00000              | 2.77108    | .726  | -14.8127                | 4.8127      |
|           | SIRNA1:1  | -.33333               | 2.77108    | 1.000 | -10.1460                | 9.4794      |
|           | sIRNA1:3  | 3.00000               | 2.77108    | .981  | -6.8127                 | 12.8127     |
|           | sIRNA3:1  | -4.00000              | 2.77108    | .899  | -13.8127                | 5.8127      |
|           | BSA1:1    | -4.00000              | 2.77108    | .899  | -13.8127                | 5.8127      |
|           | BSA1:3    | -2.00000              | 2.77108    | .999  | -11.8127                | 7.8127      |
|           | BSA3:1    | -4.00000              | 2.77108    | .899  | -13.8127                | 5.8127      |
|           | BLANK BSA | -5.00000              | 2.77108    | .726  | -14.8127                | 4.8127      |
| BLANK MIC | UNTREAT   | .00000                | 2.77108    | 1.000 | -9.8127                 | 9.8127      |
|           | BLANK RNA | 5.00000               | 2.77108    | .726  | -4.8127                 | 14.8127     |
|           | SIRNA1:1  | 4.66667               | 2.77108    | .792  | -5.1460                 | 14.4794     |
|           | sIRNA1:3  | 8.00000               | 2.77108    | .174  | -1.8127                 | 17.8127     |
|           | sIRNA3:1  | 1.00000               | 2.77108    | 1.000 | -8.8127                 | 10.8127     |
|           | BSA1:1    | 1.00000               | 2.77108    | 1.000 | -8.8127                 | 10.8127     |
|           | BSA1:3    | 3.00000               | 2.77108    | .981  | -6.8127                 | 12.8127     |
|           | BSA3:1    | 1.00000               | 2.77108    | 1.000 | -8.8127                 | 10.8127     |
|           | BLANK BSA | .00000                | 2.77108    | 1.000 | -9.8127                 | 9.8127      |
| SIRNA1:1  | UNTREAT   | -4.66667              | 2.77108    | .792  | -14.4794                | 5.1460      |
|           | BLANK RNA | .33333                | 2.77108    | 1.000 | -9.4794                 | 10.1460     |
|           | BLANK MIC | -4.66667              | 2.77108    | .792  | -14.4794                | 5.1460      |
|           | sIRNA1:3  | 3.33333               | 2.77108    | .963  | -6.4794                 | 13.1460     |
|           | sIRNA3:1  | -3.66667              | 2.77108    | .936  | -13.4794                | 6.1460      |
|           | BSA1:1    | -3.66667              | 2.77108    | .936  | -13.4794                | 6.1460      |
|           | BSA1:3    | -1.66667              | 2.77108    | 1.000 | -11.4794                | 8.1460      |
|           | BSA3:1    | -3.66667              | 2.77108    | .936  | -13.4794                | 6.1460      |
|           | BLANK BSA | -4.66667              | 2.77108    | .792  | -14.4794                | 5.1460      |
| sIRNA1:3  | UNTREAT   | -8.00000              | 2.77108    | .174  | -17.8127                | 1.8127      |
|           | BLANK RNA | -3.00000              | 2.77108    | .981  | -12.8127                | 6.8127      |
|           | BLANK MIC | -8.00000              | 2.77108    | .174  | -17.8127                | 1.8127      |

**Multiple Comparisons**

Dependent Variable: T1

Tukey HSD

| (I) F     | (J) F     | Mean Difference (I-J) | Std. Error | Sig.     | 95% Confidence Interval |             |
|-----------|-----------|-----------------------|------------|----------|-------------------------|-------------|
|           |           |                       |            |          | Lower Bound             | Upper Bound |
| siRNA3:1  | SIRNA1:1  | -3.33333              | 2.77108    | .963     | -13.1460                | 6.4794      |
|           | siRNA3:1  | -7.00000              | 2.77108    | .312     | -16.8127                | 2.8127      |
|           | BSA1:1    | -7.00000              | 2.77108    | .312     | -16.8127                | 2.8127      |
|           | BSA1:3    | -5.00000              | 2.77108    | .726     | -14.8127                | 4.8127      |
|           | BSA3:1    | -7.00000              | 2.77108    | .312     | -16.8127                | 2.8127      |
|           | BLANK BSA | -8.00000              | 2.77108    | .174     | -17.8127                | 1.8127      |
|           | UNTREAT   | -1.00000              | 2.77108    | 1.000    | -10.8127                | 8.8127      |
|           | BLANK RNA | 4.00000               | 2.77108    | .899     | -5.8127                 | 13.8127     |
|           | BLANK MIC | -1.00000              | 2.77108    | 1.000    | -10.8127                | 8.8127      |
|           | SIRNA1:1  | 3.66667               | 2.77108    | .936     | -6.1460                 | 13.4794     |
|           | siRNA1:3  | 7.00000               | 2.77108    | .312     | -2.8127                 | 16.8127     |
|           | BSA1:1    | .00000                | 2.77108    | 1.000    | -9.8127                 | 9.8127      |
|           | BSA1:3    | 2.00000               | 2.77108    | .999     | -7.8127                 | 11.8127     |
| BSA3:1    | .00000    | 2.77108               | 1.000      | -9.8127  | 9.8127                  |             |
| BLANK BSA | -1.00000  | 2.77108               | 1.000      | -10.8127 | 8.8127                  |             |
| BSA1:1    | UNTREAT   | -1.00000              | 2.77108    | 1.000    | -10.8127                | 8.8127      |
|           | BLANK RNA | 4.00000               | 2.77108    | .899     | -5.8127                 | 13.8127     |
|           | BLANK MIC | -1.00000              | 2.77108    | 1.000    | -10.8127                | 8.8127      |
|           | SIRNA1:1  | 3.66667               | 2.77108    | .936     | -6.1460                 | 13.4794     |
|           | siRNA1:3  | 7.00000               | 2.77108    | .312     | -2.8127                 | 16.8127     |
|           | siRNA3:1  | .00000                | 2.77108    | 1.000    | -9.8127                 | 9.8127      |
|           | BSA1:3    | 2.00000               | 2.77108    | .999     | -7.8127                 | 11.8127     |
|           | BSA3:1    | .00000                | 2.77108    | 1.000    | -9.8127                 | 9.8127      |
|           | BLANK BSA | -1.00000              | 2.77108    | 1.000    | -10.8127                | 8.8127      |
| BSA1:3    | UNTREAT   | -3.00000              | 2.77108    | .981     | -12.8127                | 6.8127      |
|           | BLANK RNA | 2.00000               | 2.77108    | .999     | -7.8127                 | 11.8127     |
|           | BLANK MIC | -3.00000              | 2.77108    | .981     | -12.8127                | 6.8127      |
|           | SIRNA1:1  | 1.66667               | 2.77108    | 1.000    | -8.1460                 | 11.4794     |
|           | siRNA1:3  | 5.00000               | 2.77108    | .726     | -4.8127                 | 14.8127     |
|           | siRNA3:1  | -2.00000              | 2.77108    | .999     | -11.8127                | 7.8127      |
|           | BSA1:1    | -2.00000              | 2.77108    | .999     | -11.8127                | 7.8127      |
|           | BSA3:1    | -2.00000              | 2.77108    | .999     | -11.8127                | 7.8127      |
|           | BLANK BSA | -3.00000              | 2.77108    | .981     | -12.8127                | 6.8127      |
| BSA3:1    | UNTREAT   | -1.00000              | 2.77108    | 1.000    | -10.8127                | 8.8127      |
|           | BLANK RNA | 4.00000               | 2.77108    | .899     | -5.8127                 | 13.8127     |
|           | BLANK MIC | -1.00000              | 2.77108    | 1.000    | -10.8127                | 8.8127      |
|           | SIRNA1:1  | 3.66667               | 2.77108    | .936     | -6.1460                 | 13.4794     |
|           | siRNA1:3  | 7.00000               | 2.77108    | .312     | -2.8127                 | 16.8127     |
|           | siRNA3:1  | .00000                | 2.77108    | 1.000    | -9.8127                 | 9.8127      |

### Multiple Comparisons

Dependent Variable: T1

Tukey HSD

| (I) F     | (J) F     | Mean Difference (I-J) | Std. Error | Sig.  | 95% Confidence Interval |             |
|-----------|-----------|-----------------------|------------|-------|-------------------------|-------------|
|           |           |                       |            |       | Lower Bound             | Upper Bound |
| BLANK BSA | BSA1:1    | .00000                | 2.77108    | 1.000 | -9.8127                 | 9.8127      |
|           | BSA1:3    | 2.00000               | 2.77108    | .999  | -7.8127                 | 11.8127     |
|           | BLANK BSA | -1.00000              | 2.77108    | 1.000 | -10.8127                | 8.8127      |
|           | UNTREAT   | .00000                | 2.77108    | 1.000 | -9.8127                 | 9.8127      |
|           | BLANK RNA | 5.00000               | 2.77108    | .726  | -4.8127                 | 14.8127     |
|           | BLANK MIC | .00000                | 2.77108    | 1.000 | -9.8127                 | 9.8127      |
|           | SIRNA1:1  | 4.66667               | 2.77108    | .792  | -5.1460                 | 14.4794     |
|           | sIRNA1:3  | 8.00000               | 2.77108    | .174  | -1.8127                 | 17.8127     |
|           | sIRNA3:1  | 1.00000               | 2.77108    | 1.000 | -8.8127                 | 10.8127     |
|           | BSA1:1    | 1.00000               | 2.77108    | 1.000 | -8.8127                 | 10.8127     |
|           | BSA1:3    | 3.00000               | 2.77108    | .981  | -6.8127                 | 12.8127     |
|           | BSA3:1    | 1.00000               | 2.77108    | 1.000 | -8.8127                 | 10.8127     |

### Homogeneous Subsets

T1

Tukey HSD<sup>a</sup>

| F         | N | Subset for<br>alpha = 0.05 |
|-----------|---|----------------------------|
|           |   | 1                          |
| sIRNA1:3  | 3 | 92.0000                    |
| BLANK RNA | 3 | 95.0000                    |
| SIRNA1:1  | 3 | 95.3333                    |
| BSA1:3    | 3 | 97.0000                    |
| sIRNA3:1  | 3 | 99.0000                    |
| BSA1:1    | 3 | 99.0000                    |
| BSA3:1    | 3 | 99.0000                    |
| UNTREAT   | 3 | 100.0000                   |
| BLANK MIC | 3 | 100.0000                   |
| BLANK BSA | 3 | 100.0000                   |
| Sig.      |   | .174                       |

Means for groups in homogeneous subsets are displayed.

a. Uses Harmonic Mean Sample Size = 3.000.
