# Supplementary material for: Nanoscale Diblock Copolymer Micelles: Characterizations and Estimation of the Effective Diffusion Coefficients of Biomolecules Release through Cylindrical Diffusion Model
Source: PubMed Central journal article supplement (PMC4136833; doi:10.1371/journal.pone.0105234), 2014-08-18
Supplement: pone.0105234.s005.pdf [file pone.0105234.s005.pdf]

```

ONEWAY V79 BY F
/MISSING ANALYSIS
/POSTHOC=TUKEY ALPHA(0.05).

```

## Oneway

### Notes

|                        |                                                                     |                                                                                                        |
|------------------------|---------------------------------------------------------------------|--------------------------------------------------------------------------------------------------------|
| Output Created         | 08-SEP-2013 19:19:32                                                |                                                                                                        |
| Comments               |                                                                     |                                                                                                        |
| Input                  | Active Dataset                                                      | DataSet1                                                                                               |
|                        | Filter                                                              | <none>                                                                                                 |
|                        | Weight                                                              | <none>                                                                                                 |
|                        | Split File                                                          | <none>                                                                                                 |
|                        | N of Rows in Working Data File                                      | 30                                                                                                     |
| Missing Value Handling | Definition of Missing                                               | User-defined missing values are treated as missing.                                                    |
|                        | Cases Used                                                          | Statistics for each analysis are based on cases with no missing data for any variable in the analysis. |
| Syntax                 | ONEWAY V79 BY F<br>/MISSING ANALYSIS<br>/POSTHOC=TUKEY ALPHA(0.05). |                                                                                                        |
| Resources              | Processor Time                                                      | 00:00:00.03                                                                                            |
|                        | Elapsed Time                                                        | 00:00:00.02                                                                                            |

[DataSet1]

### ANOVA

V79

|                | Sum of Squares | df | Mean Square | F     | Sig. |
|----------------|----------------|----|-------------|-------|------|
| Between Groups | 572.700        | 9  | 63.633      | 5.259 | .001 |
| Within Groups  | 242.000        | 20 | 12.100      |       |      |
| Total          | 814.700        | 29 |             |       |      |

## Post Hoc Tests

**Multiple Comparisons**

Dependent Variable: V79

Tukey HSD

| (I) F     | (J) F     | Mean Difference (I-J) | Std. Error | Sig.  | 95% Confidence Interval |             |
|-----------|-----------|-----------------------|------------|-------|-------------------------|-------------|
|           |           |                       |            |       | Lower Bound             | Upper Bound |
| UNTREAT   | BLANK RNA | .00000                | 2.84019    | 1.000 | -10.0574                | 10.0574     |
|           | BLANK MIC | .00000                | 2.84019    | 1.000 | -10.0574                | 10.0574     |
|           | SIRNA1:1  | 5.00000               | 2.84019    | .751  | -5.0574                 | 15.0574     |
|           | sIRNA1:3  | 15.00000*             | 2.84019    | .001  | 4.9426                  | 25.0574     |
|           | sIRNA3:1  | 4.00000               | 2.84019    | .911  | -6.0574                 | 14.0574     |
|           | BSA1:1    | 2.00000               | 2.84019    | .999  | -8.0574                 | 12.0574     |
|           | BSA1:3    | 4.00000               | 2.84019    | .911  | -6.0574                 | 14.0574     |
|           | BSA3:1    | 1.00000               | 2.84019    | 1.000 | -9.0574                 | 11.0574     |
|           | BLANK BSA | .00000                | 2.84019    | 1.000 | -10.0574                | 10.0574     |
| BLANK RNA | UNTREAT   | .00000                | 2.84019    | 1.000 | -10.0574                | 10.0574     |
|           | BLANK MIC | .00000                | 2.84019    | 1.000 | -10.0574                | 10.0574     |
|           | SIRNA1:1  | 5.00000               | 2.84019    | .751  | -5.0574                 | 15.0574     |
|           | sIRNA1:3  | 15.00000*             | 2.84019    | .001  | 4.9426                  | 25.0574     |
|           | sIRNA3:1  | 4.00000               | 2.84019    | .911  | -6.0574                 | 14.0574     |
|           | BSA1:1    | 2.00000               | 2.84019    | .999  | -8.0574                 | 12.0574     |
|           | BSA1:3    | 4.00000               | 2.84019    | .911  | -6.0574                 | 14.0574     |
|           | BSA3:1    | 1.00000               | 2.84019    | 1.000 | -9.0574                 | 11.0574     |
|           | BLANK BSA | .00000                | 2.84019    | 1.000 | -10.0574                | 10.0574     |
| BLANK MIC | UNTREAT   | .00000                | 2.84019    | 1.000 | -10.0574                | 10.0574     |
|           | BLANK RNA | .00000                | 2.84019    | 1.000 | -10.0574                | 10.0574     |
|           | SIRNA1:1  | 5.00000               | 2.84019    | .751  | -5.0574                 | 15.0574     |
|           | sIRNA1:3  | 15.00000*             | 2.84019    | .001  | 4.9426                  | 25.0574     |
|           | sIRNA3:1  | 4.00000               | 2.84019    | .911  | -6.0574                 | 14.0574     |
|           | BSA1:1    | 2.00000               | 2.84019    | .999  | -8.0574                 | 12.0574     |
|           | BSA1:3    | 4.00000               | 2.84019    | .911  | -6.0574                 | 14.0574     |
|           | BSA3:1    | 1.00000               | 2.84019    | 1.000 | -9.0574                 | 11.0574     |
|           | BLANK BSA | .00000                | 2.84019    | 1.000 | -10.0574                | 10.0574     |
| SIRNA1:1  | UNTREAT   | -5.00000              | 2.84019    | .751  | -15.0574                | 5.0574      |
|           | BLANK RNA | -5.00000              | 2.84019    | .751  | -15.0574                | 5.0574      |
|           | BLANK MIC | -5.00000              | 2.84019    | .751  | -15.0574                | 5.0574      |
|           | sIRNA1:3  | 10.00000              | 2.84019    | .052  | -.0574                  | 20.0574     |
|           | sIRNA3:1  | -1.00000              | 2.84019    | 1.000 | -11.0574                | 9.0574      |
|           | BSA1:1    | -3.00000              | 2.84019    | .984  | -13.0574                | 7.0574      |
|           | BSA1:3    | -1.00000              | 2.84019    | 1.000 | -11.0574                | 9.0574      |
|           | BSA3:1    | -4.00000              | 2.84019    | .911  | -14.0574                | 6.0574      |
|           | BLANK BSA | -5.00000              | 2.84019    | .751  | -15.0574                | 5.0574      |
| sIRNA1:3  | UNTREAT   | -15.00000*            | 2.84019    | .001  | -25.0574                | -4.9426     |
|           | BLANK RNA | -15.00000*            | 2.84019    | .001  | -25.0574                | -4.9426     |
|           | BLANK MIC | -15.00000*            | 2.84019    | .001  | -25.0574                | -4.9426     |

**Multiple Comparisons**

Dependent Variable: V79

Tukey HSD

| (I) F     | (J) F     | Mean Difference (I-J) | Std. Error | Sig.     | 95% Confidence Interval |             |
|-----------|-----------|-----------------------|------------|----------|-------------------------|-------------|
|           |           |                       |            |          | Lower Bound             | Upper Bound |
| siRNA3:1  | SIRNA1:1  | -10.00000             | 2.84019    | .052     | -20.0574                | .0574       |
|           | siRNA3:1  | -11.00000*            | 2.84019    | .025     | -21.0574                | -.9426      |
|           | BSA1:1    | -13.00000*            | 2.84019    | .006     | -23.0574                | -2.9426     |
|           | BSA1:3    | -11.00000*            | 2.84019    | .025     | -21.0574                | -.9426      |
|           | BSA3:1    | -14.00000*            | 2.84019    | .003     | -24.0574                | -3.9426     |
|           | BLANK BSA | -15.00000*            | 2.84019    | .001     | -25.0574                | -4.9426     |
|           | UNTREAT   | -4.00000              | 2.84019    | .911     | -14.0574                | 6.0574      |
|           | BLANK RNA | -4.00000              | 2.84019    | .911     | -14.0574                | 6.0574      |
|           | BLANK MIC | -4.00000              | 2.84019    | .911     | -14.0574                | 6.0574      |
|           | SIRNA1:1  | 1.00000               | 2.84019    | 1.000    | -9.0574                 | 11.0574     |
|           | siRNA1:3  | 11.00000*             | 2.84019    | .025     | .9426                   | 21.0574     |
|           | BSA1:1    | -2.00000              | 2.84019    | .999     | -12.0574                | 8.0574      |
|           | BSA1:3    | .00000                | 2.84019    | 1.000    | -10.0574                | 10.0574     |
|           | BSA3:1    | -3.00000              | 2.84019    | .984     | -13.0574                | 7.0574      |
| BLANK BSA | -4.00000  | 2.84019               | .911       | -14.0574 | 6.0574                  |             |
| BSA1:1    | UNTREAT   | -2.00000              | 2.84019    | .999     | -12.0574                | 8.0574      |
|           | BLANK RNA | -2.00000              | 2.84019    | .999     | -12.0574                | 8.0574      |
|           | BLANK MIC | -2.00000              | 2.84019    | .999     | -12.0574                | 8.0574      |
|           | SIRNA1:1  | 3.00000               | 2.84019    | .984     | -7.0574                 | 13.0574     |
|           | siRNA1:3  | 13.00000*             | 2.84019    | .006     | 2.9426                  | 23.0574     |
|           | siRNA3:1  | 2.00000               | 2.84019    | .999     | -8.0574                 | 12.0574     |
|           | BSA1:3    | 2.00000               | 2.84019    | .999     | -8.0574                 | 12.0574     |
|           | BSA3:1    | -1.00000              | 2.84019    | 1.000    | -11.0574                | 9.0574      |
|           | BLANK BSA | -2.00000              | 2.84019    | .999     | -12.0574                | 8.0574      |
| BSA1:3    | UNTREAT   | -4.00000              | 2.84019    | .911     | -14.0574                | 6.0574      |
|           | BLANK RNA | -4.00000              | 2.84019    | .911     | -14.0574                | 6.0574      |
|           | BLANK MIC | -4.00000              | 2.84019    | .911     | -14.0574                | 6.0574      |
|           | SIRNA1:1  | 1.00000               | 2.84019    | 1.000    | -9.0574                 | 11.0574     |
|           | siRNA1:3  | 11.00000*             | 2.84019    | .025     | .9426                   | 21.0574     |
|           | siRNA3:1  | .00000                | 2.84019    | 1.000    | -10.0574                | 10.0574     |
|           | BSA1:1    | -2.00000              | 2.84019    | .999     | -12.0574                | 8.0574      |
|           | BSA3:1    | -3.00000              | 2.84019    | .984     | -13.0574                | 7.0574      |
|           | BLANK BSA | -4.00000              | 2.84019    | .911     | -14.0574                | 6.0574      |
| BSA3:1    | UNTREAT   | -1.00000              | 2.84019    | 1.000    | -11.0574                | 9.0574      |
|           | BLANK RNA | -1.00000              | 2.84019    | 1.000    | -11.0574                | 9.0574      |
|           | BLANK MIC | -1.00000              | 2.84019    | 1.000    | -11.0574                | 9.0574      |
|           | SIRNA1:1  | 4.00000               | 2.84019    | .911     | -6.0574                 | 14.0574     |
|           | siRNA1:3  | 14.00000*             | 2.84019    | .003     | 3.9426                  | 24.0574     |
|           | siRNA3:1  | 3.00000               | 2.84019    | .984     | -7.0574                 | 13.0574     |

### Multiple Comparisons

Dependent Variable: V79

Tukey HSD

| (I) F     | (J) F     | Mean Difference (I-J) | Std. Error | Sig.  | 95% Confidence Interval |             |
|-----------|-----------|-----------------------|------------|-------|-------------------------|-------------|
|           |           |                       |            |       | Lower Bound             | Upper Bound |
| BLANK BSA | BSA1:1    | 1.00000               | 2.84019    | 1.000 | -9.0574                 | 11.0574     |
|           | BSA1:3    | 3.00000               | 2.84019    | .984  | -7.0574                 | 13.0574     |
|           | BLANK BSA | -1.00000              | 2.84019    | 1.000 | -11.0574                | 9.0574      |
|           | UNTREAT   | .00000                | 2.84019    | 1.000 | -10.0574                | 10.0574     |
|           | BLANK RNA | .00000                | 2.84019    | 1.000 | -10.0574                | 10.0574     |
|           | BLANK MIC | .00000                | 2.84019    | 1.000 | -10.0574                | 10.0574     |
|           | SIRNA1:1  | 5.00000               | 2.84019    | .751  | -5.0574                 | 15.0574     |
|           | sIRNA1:3  | 15.00000*             | 2.84019    | .001  | 4.9426                  | 25.0574     |
|           | sIRNA3:1  | 4.00000               | 2.84019    | .911  | -6.0574                 | 14.0574     |
|           | BSA1:1    | 2.00000               | 2.84019    | .999  | -8.0574                 | 12.0574     |
|           | BSA1:3    | 4.00000               | 2.84019    | .911  | -6.0574                 | 14.0574     |
|           | BSA3:1    | 1.00000               | 2.84019    | 1.000 | -9.0574                 | 11.0574     |

\*. The mean difference is significant at the 0.05 level.

### Homogeneous Subsets

V79

Tukey HSD<sup>a</sup>

| F         | N | Subset for alpha = 0.05 |          |
|-----------|---|-------------------------|----------|
|           |   | 1                       | 2        |
| sIRNA1:3  | 3 | 85.0000                 |          |
| SIRNA1:1  | 3 | 95.0000                 | 95.0000  |
| sIRNA3:1  | 3 |                         | 96.0000  |
| BSA1:3    | 3 |                         | 96.0000  |
| BSA1:1    | 3 |                         | 98.0000  |
| BSA3:1    | 3 |                         | 99.0000  |
| UNTREAT   | 3 |                         | 100.0000 |
| BLANK RNA | 3 |                         | 100.0000 |
| BLANK MIC | 3 |                         | 100.0000 |
| BLANK BSA | 3 |                         | 100.0000 |
| Sig.      |   | .052                    | .751     |

Means for groups in homogeneous subsets are displayed.

a. Uses Harmonic Mean Sample Size = 3.000.
