# Supplementary material for: Nanoscale Diblock Copolymer Micelles: Characterizations and Estimation of the Effective Diffusion Coefficients of Biomolecules Release through Cylindrical Diffusion Model
Source: PubMed Central journal article supplement (PMC4136833; doi:10.1371/journal.pone.0105234), 2014-08-18
Supplement: pone.0105234.s006.pdf [file pone.0105234.s006.pdf]

```

ONEWAY ee BY f
/MISSING ANALYSIS
/POSTHOC=TUKEY ALPHA(0.05) .

```

## Oneway

### Notes

|                        |                                                                    |                                                                                                        |
|------------------------|--------------------------------------------------------------------|--------------------------------------------------------------------------------------------------------|
| Output Created         | 08-SEP-2013 18:52:26                                               |                                                                                                        |
| Comments               |                                                                    |                                                                                                        |
| Input                  | Active Dataset                                                     | DataSet0                                                                                               |
|                        | Filter                                                             | <none>                                                                                                 |
|                        | Weight                                                             | <none>                                                                                                 |
|                        | Split File                                                         | <none>                                                                                                 |
|                        | N of Rows in Working Data File                                     | 27                                                                                                     |
| Missing Value Handling | Definition of Missing                                              | User-defined missing values are treated as missing.                                                    |
|                        | Cases Used                                                         | Statistics for each analysis are based on cases with no missing data for any variable in the analysis. |
| Syntax                 | ONEWAY ee BY f<br>/MISSING ANALYSIS<br>/POSTHOC=TUKEY ALPHA(0.05). |                                                                                                        |
| Resources              | Processor Time                                                     | 00:00:00.00                                                                                            |
|                        | Elapsed Time                                                       | 00:00:00.02                                                                                            |

[DataSet0]

### ANOVA

ee

|                | Sum of Squares | df | Mean Square | F       | Sig. |
|----------------|----------------|----|-------------|---------|------|
| Between Groups | 2765.340       | 5  | 553.068     | 452.414 | .000 |
| Within Groups  | 14.670         | 12 | 1.222       |         |      |
| Total          | 2780.010       | 17 |             |         |      |

## Post Hoc Tests

### Multiple Comparisons

Dependent Variable: ee

Tukey HSD

| (I) f   | (J) f   | Mean Difference (I-J) | Std. Error | Sig. | 95% Confidence Interval |             |
|---------|---------|-----------------------|------------|------|-------------------------|-------------|
|         |         |                       |            |      | Lower Bound             | Upper Bound |
| SIRNA11 | SIRNA13 | -2.00000              | .90277     | .298 | -5.0323                 | 1.0323      |
|         | SIRNA31 | 1.30000               | .90277     | .705 | -1.7323                 | 4.3323      |
|         | BSA11   | 24.70000*             | .90277     | .000 | 21.6677                 | 27.7323     |
|         | BSA13   | 21.00000*             | .90277     | .000 | 17.9677                 | 24.0323     |
|         | BSA31   | 27.00000*             | .90277     | .000 | 23.9677                 | 30.0323     |
| SIRNA13 | SIRNA11 | 2.00000               | .90277     | .298 | -1.0323                 | 5.0323      |
|         | SIRNA31 | 3.30000*              | .90277     | .030 | .2677                   | 6.3323      |
|         | BSA11   | 26.70000*             | .90277     | .000 | 23.6677                 | 29.7323     |
|         | BSA13   | 23.00000*             | .90277     | .000 | 19.9677                 | 26.0323     |
|         | BSA31   | 29.00000*             | .90277     | .000 | 25.9677                 | 32.0323     |
| SIRNA31 | SIRNA11 | -1.30000              | .90277     | .705 | -4.3323                 | 1.7323      |
|         | SIRNA13 | -3.30000*             | .90277     | .030 | -6.3323                 | -.2677      |
|         | BSA11   | 23.40000*             | .90277     | .000 | 20.3677                 | 26.4323     |
|         | BSA13   | 19.70000*             | .90277     | .000 | 16.6677                 | 22.7323     |
|         | BSA31   | 25.70000*             | .90277     | .000 | 22.6677                 | 28.7323     |
| BSA11   | SIRNA11 | -24.70000*            | .90277     | .000 | -27.7323                | -21.6677    |
|         | SIRNA13 | -26.70000*            | .90277     | .000 | -29.7323                | -23.6677    |
|         | SIRNA31 | -23.40000*            | .90277     | .000 | -26.4323                | -20.3677    |
|         | BSA13   | -3.70000*             | .90277     | .014 | -6.7323                 | -.6677      |
|         | BSA31   | 2.30000               | .90277     | .185 | -.7323                  | 5.3323      |
| BSA13   | SIRNA11 | -21.00000*            | .90277     | .000 | -24.0323                | -17.9677    |
|         | SIRNA13 | -23.00000*            | .90277     | .000 | -26.0323                | -19.9677    |
|         | SIRNA31 | -19.70000*            | .90277     | .000 | -22.7323                | -16.6677    |
|         | BSA11   | 3.70000*              | .90277     | .014 | .6677                   | 6.7323      |
|         | BSA31   | 6.00000*              | .90277     | .000 | 2.9677                  | 9.0323      |
| BSA31   | SIRNA11 | -27.00000*            | .90277     | .000 | -30.0323                | -23.9677    |
|         | SIRNA13 | -29.00000*            | .90277     | .000 | -32.0323                | -25.9677    |
|         | SIRNA31 | -25.70000*            | .90277     | .000 | -28.7323                | -22.6677    |
|         | BSA11   | -2.30000              | .90277     | .185 | -5.3323                 | .7323       |
|         | BSA13   | -6.00000*             | .90277     | .000 | -9.0323                 | -2.9677     |

\*. The mean difference is significant at the 0.05 level.

### Homogeneous Subsets

ee

Tukey HSD<sup>a</sup>

| f       | N | Subset for alpha = 0.05 |         |         |         |
|---------|---|-------------------------|---------|---------|---------|
|         |   | 1                       | 2       | 3       | 4       |
| BSA31   | 3 | 68.0000                 |         |         |         |
| BSA11   | 3 | 70.3000                 |         |         |         |
| BSA13   | 3 |                         | 74.0000 |         |         |
| SIRNA31 | 3 |                         |         | 93.7000 |         |
| SIRNA11 | 3 |                         |         | 95.0000 | 95.0000 |
| SIRNA13 | 3 |                         |         |         | 97.0000 |
| Sig.    |   | .185                    | 1.000   | .705    | .298    |

Means for groups in homogeneous subsets are displayed.

a. Uses Harmonic Mean Sample Size = 3.000.
