# Supplementary material for: Nanoscale Diblock Copolymer Micelles: Characterizations and Estimation of the Effective Diffusion Coefficients of Biomolecules Release through Cylindrical Diffusion Model
Source: PubMed Central journal article supplement (PMC4136833; doi:10.1371/journal.pone.0105234), 2014-08-18
Supplement: pone.0105234.s007.pdf [file pone.0105234.s007.pdf]

```

ONEWAY zeta BY f
/MISSING ANALYSIS
/POSTHOC=TUKEY ALPHA(0.05).

```

## Oneway

### Notes

|                        |                                                                      |                                                                                                        |
|------------------------|----------------------------------------------------------------------|--------------------------------------------------------------------------------------------------------|
| Output Created         | 08-SEP-2013 18:44:26                                                 |                                                                                                        |
| Comments               |                                                                      |                                                                                                        |
| Input                  | Active Dataset                                                       | DataSet0                                                                                               |
|                        | Filter                                                               | <none>                                                                                                 |
|                        | Weight                                                               | <none>                                                                                                 |
|                        | Split File                                                           | <none>                                                                                                 |
|                        | N of Rows in Working Data File                                       | 27                                                                                                     |
| Missing Value Handling | Definition of Missing                                                | User-defined missing values are treated as missing.                                                    |
|                        | Cases Used                                                           | Statistics for each analysis are based on cases with no missing data for any variable in the analysis. |
| Syntax                 | ONEWAY zeta BY f<br>/MISSING ANALYSIS<br>/POSTHOC=TUKEY ALPHA(0.05). |                                                                                                        |
| Resources              | Processor Time                                                       | 00:00:00.03                                                                                            |
|                        | Elapsed Time                                                         | 00:00:00.02                                                                                            |

[DataSet0]

### ANOVA

zeta

|                | Sum of Squares | df | Mean Square | F      | Sig. |
|----------------|----------------|----|-------------|--------|------|
| Between Groups | 443.507        | 8  | 55.438      | 50.045 | .000 |
| Within Groups  | 19.940         | 18 | 1.108       |        |      |
| Total          | 463.447        | 26 |             |        |      |

## Post Hoc Tests

**Multiple Comparisons**

Dependent Variable: zeta

Tukey HSD

| (I) f   | (J) f   | Mean Difference (I-J) | Std. Error | Sig.  | 95% Confidence Interval |             |
|---------|---------|-----------------------|------------|-------|-------------------------|-------------|
|         |         |                       |            |       | Lower Bound             | Upper Bound |
| B11     | B13     | -6.5000*              | .85937     | .000  | -9.5111                 | -3.4889     |
|         | B31     | 3.00000               | .85937     | .051  | -.0111                  | 6.0111      |
|         | SIRNA11 | 5.40000*              | .85937     | .000  | 2.3889                  | 8.4111      |
|         | SIRNA13 | 9.00000*              | .85937     | .000  | 5.9889                  | 12.0111     |
|         | SIRNA31 | 4.40000*              | .85937     | .002  | 1.3889                  | 7.4111      |
|         | BSA11   | 2.10000               | .85937     | .319  | -.9111                  | 5.1111      |
|         | BSA13   | .50000                | .85937     | 1.000 | -2.5111                 | 3.5111      |
|         | BSA31   | 3.90000*              | .85937     | .006  | .8889                   | 6.9111      |
| B13     | B11     | 6.50000*              | .85937     | .000  | 3.4889                  | 9.5111      |
|         | B31     | 9.50000*              | .85937     | .000  | 6.4889                  | 12.5111     |
|         | SIRNA11 | 11.90000*             | .85937     | .000  | 8.8889                  | 14.9111     |
|         | SIRNA13 | 15.50000*             | .85937     | .000  | 12.4889                 | 18.5111     |
|         | SIRNA31 | 10.90000*             | .85937     | .000  | 7.8889                  | 13.9111     |
|         | BSA11   | 8.60000*              | .85937     | .000  | 5.5889                  | 11.6111     |
|         | BSA13   | 7.00000*              | .85937     | .000  | 3.9889                  | 10.0111     |
|         | BSA31   | 10.40000*             | .85937     | .000  | 7.3889                  | 13.4111     |
| B31     | B11     | -3.00000              | .85937     | .051  | -6.0111                 | .0111       |
|         | B13     | -9.50000*             | .85937     | .000  | -12.5111                | -6.4889     |
|         | SIRNA11 | 2.40000               | .85937     | .184  | -.6111                  | 5.4111      |
|         | SIRNA13 | 6.00000*              | .85937     | .000  | 2.9889                  | 9.0111      |
|         | SIRNA31 | 1.40000               | .85937     | .778  | -1.6111                 | 4.4111      |
|         | BSA11   | -.90000               | .85937     | .975  | -3.9111                 | 2.1111      |
|         | BSA13   | -2.50000              | .85937     | .151  | -5.5111                 | .5111       |
|         | BSA31   | .90000                | .85937     | .975  | -2.1111                 | 3.9111      |
| SIRNA11 | B11     | -5.40000*             | .85937     | .000  | -8.4111                 | -2.3889     |
|         | B13     | -11.90000*            | .85937     | .000  | -14.9111                | -8.8889     |
|         | B31     | -2.40000              | .85937     | .184  | -5.4111                 | .6111       |
|         | SIRNA13 | 3.60000*              | .85937     | .013  | .5889                   | 6.6111      |
|         | SIRNA31 | -1.00000              | .85937     | .955  | -4.0111                 | 2.0111      |
|         | BSA11   | -3.30000*             | .85937     | .026  | -6.3111                 | -.2889      |
|         | BSA13   | -4.90000*             | .85937     | .001  | -7.9111                 | -1.8889     |
|         | BSA31   | -1.50000              | .85937     | .714  | -4.5111                 | 1.5111      |
| SIRNA13 | B11     | -9.00000*             | .85937     | .000  | -12.0111                | -5.9889     |
|         | B13     | -15.50000*            | .85937     | .000  | -18.5111                | -12.4889    |

**Multiple Comparisons**

Dependent Variable: zeta

Tukey HSD

| (I) f   | (J) f   | Mean Difference (I-J) | Std. Error | Sig.  | 95% Confidence Interval |             |
|---------|---------|-----------------------|------------|-------|-------------------------|-------------|
|         |         |                       |            |       | Lower Bound             | Upper Bound |
| SIRNA31 | B31     | -6.0000*              | .85937     | .000  | -9.0111                 | -2.9889     |
|         | SIRNA11 | -3.6000*              | .85937     | .013  | -6.6111                 | -.5889      |
|         | SIRNA31 | -4.6000*              | .85937     | .001  | -7.6111                 | -1.5889     |
|         | BSA11   | -6.9000*              | .85937     | .000  | -9.9111                 | -3.8889     |
|         | BSA13   | -8.5000*              | .85937     | .000  | -11.5111                | -5.4889     |
|         | BSA31   | -5.1000*              | .85937     | .000  | -8.1111                 | -2.0889     |
|         | B11     | -4.4000*              | .85937     | .002  | -7.4111                 | -1.3889     |
|         | B13     | -10.9000*             | .85937     | .000  | -13.9111                | -7.8889     |
|         | B31     | -1.40000              | .85937     | .778  | -4.4111                 | 1.6111      |
|         | SIRNA11 | 1.00000               | .85937     | .955  | -2.0111                 | 4.0111      |
| BSA11   | SIRNA13 | 4.6000*               | .85937     | .001  | 1.5889                  | 7.6111      |
|         | BSA11   | -2.30000              | .85937     | .223  | -5.3111                 | .7111       |
|         | BSA13   | -3.9000*              | .85937     | .006  | -6.9111                 | -.8889      |
|         | BSA31   | -.50000               | .85937     | 1.000 | -3.5111                 | 2.5111      |
|         | B11     | -2.10000              | .85937     | .319  | -5.1111                 | .9111       |
|         | B13     | -8.6000*              | .85937     | .000  | -11.6111                | -5.5889     |
|         | B31     | .90000                | .85937     | .975  | -2.1111                 | 3.9111      |
|         | SIRNA11 | 3.3000*               | .85937     | .026  | .2889                   | 6.3111      |
| BSA13   | SIRNA13 | 6.9000*               | .85937     | .000  | 3.8889                  | 9.9111      |
|         | SIRNA31 | 2.30000               | .85937     | .223  | -.7111                  | 5.3111      |
|         | BSA13   | -1.60000              | .85937     | .645  | -4.6111                 | 1.4111      |
|         | BSA31   | 1.80000               | .85937     | .505  | -1.2111                 | 4.8111      |
|         | B11     | -.50000               | .85937     | 1.000 | -3.5111                 | 2.5111      |
|         | B13     | -7.0000*              | .85937     | .000  | -10.0111                | -3.9889     |
|         | B31     | 2.50000               | .85937     | .151  | -.5111                  | 5.5111      |
|         | SIRNA11 | 4.9000*               | .85937     | .001  | 1.8889                  | 7.9111      |
| BSA31   | SIRNA13 | 8.5000*               | .85937     | .000  | 5.4889                  | 11.5111     |
|         | SIRNA31 | 3.9000*               | .85937     | .006  | .8889                   | 6.9111      |
|         | BSA11   | 1.60000               | .85937     | .645  | -1.4111                 | 4.6111      |
|         | BSA31   | 3.4000*               | .85937     | .020  | .3889                   | 6.4111      |
|         | B11     | -3.9000*              | .85937     | .006  | -6.9111                 | -.8889      |
|         | B13     | -10.4000*             | .85937     | .000  | -13.4111                | -7.3889     |
|         | B31     | -.90000               | .85937     | .975  | -3.9111                 | 2.1111      |
|         | SIRNA11 | 1.50000               | .85937     | .714  | -1.5111                 | 4.5111      |
| BSA11   | SIRNA13 | 5.1000*               | .85937     | .000  | 2.0889                  | 8.1111      |
|         | SIRNA31 | .50000                | .85937     | 1.000 | -2.5111                 | 3.5111      |
|         | BSA11   | -1.80000              | .85937     | .505  | -4.8111                 | 1.2111      |
|         | BSA13   | -3.4000*              | .85937     | .020  | -6.4111                 | -.3889      |

\*. The mean difference is significant at the 0.05 level.

## Homogeneous Subsets

zeta

Tukey HSD<sup>a</sup>

| f       | N | Subset for alpha = 0.05 |        |         |         |         |
|---------|---|-------------------------|--------|---------|---------|---------|
|         |   | 1                       | 2      | 3       | 4       | 5       |
| SIRNA13 | 3 | 3.2000                  |        |         |         |         |
| SIRNA11 | 3 |                         | 6.8000 |         |         |         |
| SIRNA31 | 3 |                         | 7.8000 | 7.8000  |         |         |
| BSA31   | 3 |                         | 8.3000 | 8.3000  |         |         |
| B31     | 3 |                         | 9.2000 | 9.2000  | 9.2000  |         |
| BSA11   | 3 |                         |        | 10.1000 | 10.1000 |         |
| BSA13   | 3 |                         |        |         | 11.7000 |         |
| B11     | 3 |                         |        |         | 12.2000 |         |
| B13     | 3 |                         |        |         |         | 18.7000 |
| Sig.    |   | 1.000                   | .184   | .223    | .051    | 1.000   |

Means for groups in homogeneous subsets are displayed.

a. Uses Harmonic Mean Sample Size = 3.000.
